# Supplementary material for: Assessing risk factors and impact of cyberbullying victimization among university students in Myanmar: A cross-sectional study
Source: PubMed Central journal article supplement (PMC6975531; doi:10.1371/journal.pone.0227051), 2020-01-22
Supplement: pone.0227051.s001.pdf [file pone.0227051.s001.pdf]

ကျောင်းသား၊ ကျောင်းသူများထံမှ နည်းပညာ (လက်ကိုင်ဖုန်း၊ ဖွဲ့စည်းစဉ်၊ လူမှုကွန်ယက်၊ အင်တာနက်၊ လျှို့ဝှက်ကင်မရာ) များအသုံးပြု၍ ထိခိုက် နစ်နာစေမှု နှင့် ဆက်စပ်သည့် အချက်အလက်များကို လေ့လာသည့် မေးခွန်းလွှာများသည် သုတေသန ပြုလုပ်ရန်အတွက်သာ ဖြစ်သည်။ အဖြေလွှာများ ကို စနစ်တကျ၊ လုံခြုံစွာ ထိန်းသိမ်းထားမည် ဖြစ်သောကြောင့် လွတ်လပ်စွာ ဖြေဆိုနိုင်ပါသည်။

နေ့စွဲ \_\_\_\_\_ အမှတ်စဉ်

**အပိုင်း (၁) ဖြေဆိုသူ၏ နောက်ခံ အချက်အလက်များ (သင်ဖြေဆိုလိုသည့် အဖြေ၏ နံပါတ်ကို ဝိုင်းပါ။)**

| စဉ် | မေးခွန်း                                                                                   | အဖြေ                                                                                                                         |
|-----|--------------------------------------------------------------------------------------------|------------------------------------------------------------------------------------------------------------------------------|
| ၁။  | အသက် (ပြည့်ပြီးအသက်)                                                                       | _____ နှစ်                                                                                                                   |
| ၂။  | ကျား/မ                                                                                     | ၁။ ကျား<br>၂။ မ                                                                                                              |
| ၃။  | လက်ရှိအိမ်ထောင်ရေးအခြေအနေ                                                                  | ၁။ လူပျို၊ အပျို<br>၂။ အိမ်ထောင်ရှိ<br>၃။ ကွာရှင်း/အတူမနေ (ကွဲကွာ)<br>၄။ မုဆိုးဖို/ မုဆိုးမ                                  |
| ၄။  | ဤတက္ကသိုလ်တွင် ယနေ့အချိန်အထိပညာသင်ကြားနေသော အချိန် (နှစ်)စုစုပေါင်း                        | _____ (နှစ်)                                                                                                                 |
| ၅။  | သင်ယခု ကျောင်းတက်နေစဉ် မိသားစုနှင့်ခွဲ၍ အဆောင်နေပါသလား။                                    | ၁။ အဆောင်နေပါသည်။<br>၂။ အဆောင်မနေပါ။                                                                                         |
| ၆။  | သင့်အိမ်တည်ရှိသော တိုင်းဒေသကြီး၊ ပြည်နယ်                                                   | _____                                                                                                                        |
| ၇။  | သင်လတ်တလောအများဆုံး အသုံးပြုနေသော လူမှုကွန်ယက်များမှာ (အဖြေတစ်ခုထက်ပို၍ ဖြေဆိုနိုင်ပါသည်။) | ၁. facebook<br>၂. Instagram<br>၃. You tube<br>၄. Viber<br>၅. We Chat<br>၆. Bee Talk<br>၇. အခြား _____<br>(တိတိကျကျဖော်ပြပါ။) |
| ၈။  | လူမှုကွန်ယက်များပေါ်တွင် သင်တနေ့ပျမ်းမျှ အချိန် မည်မျှသုံးပါသလဲ။                           | _____ (မိနစ်/နာရီ)                                                                                                           |

**အပိုင်း (၂) မေးခွန်း**

**နည်းပညာ (လက်ကိုင်ဖုန်း၊ ဖွဲ့စည်းဘုတ်၊ လူမှုကွန်ယက်၊ အင်တာနက်၊ လျှို့ဝှက်ကင်မရာ) များအသုံးပြု၍ ထိခိုက် နစ်နာစေမှု (သင်ဖြေဆိုလိုသည့် အဖြေ၏ နံပါတ်ကို ဝိုင်းပါ။)**

| စဉ် | မေးခွန်း                                                                                                                                                                                                                                                   | အဖြေ                                                                          |
|-----|------------------------------------------------------------------------------------------------------------------------------------------------------------------------------------------------------------------------------------------------------------|-------------------------------------------------------------------------------|
|     | <b>တစ်စုံတစ်ယောက်သည် သင့်အား အောက်ဖော်ပြပါအချက်များကို ပြုလုပ်ခဲ့ဖူးပါသလား။</b>                                                                                                                                                                            |                                                                               |
| ၁။  | တစ်စုံတစ်ယောက်သည် သင့်လက်ကိုင်ဖုန်း၊ လူမှုကွန်ယက် များကို ခွင့်ပြုချက်မရှိဘဲ စစ်ဆေးခြင်း (သို့) ခိုးယူအသုံးပြု ခြင်း (သို့) သင့် Password/လူမှုကွန်ယက်အကောင့်များ ကို ခိုးယူအသုံးပြု၍ သင့်ဟန်ဆောင်ခြင်းကို ပြီးခဲ့တဲ့ (၁၂) လ အတွင်း ကြုံတွေ့ခဲ့ဖူးပါ သလား။ | ၁။ ကြုံတွေ့ခဲ့ရပါသည်။<br>၂။ မကြုံတွေ့ခဲ့ရပါ။<br>၃။ မသိပါ။<br>၄။ မဖြေဆိုလိုပါ။ |
| ၂။  | တစ်စုံတစ်ယောက်သည် သင့်ခွင့်ပြုချက်မပါဘဲ သင့်ဓာတ်ပုံများအား အွန်လိုင်းပေါ်တင်ခြင်း (သို့) အွန်လိုင်းပေါ်တွင်အသုံးပြုခြင်းကို ပြီးခဲ့တဲ့ (၁၂) လ အတွင်း ကြုံတွေ့ခဲ့ဖူးပါသလား။                                                                                 | ၁။ ကြုံတွေ့ခဲ့ရပါသည်။<br>၂။ မကြုံတွေ့ခဲ့ရပါ။<br>၃။ မသိပါ။<br>၄။ မဖြေဆိုလိုပါ။ |
| ၃။  | တစ်စုံတစ်ယောက်က အွန်လိုင်း/လူမှုကွန်ယက်များမှတစ်ဆင့် သင့်နှင့်ပတ်သက် သောမဟုတ်မမှန် သတင်းများ (သို့) ကောလဟာလများလွှင့်ခြင်းကို ပြီးခဲ့တဲ့ (၁၂) လ အတွင်း ကြုံတွေ့ခဲ့ဖူးပါသလား။                                                                               | ၁။ ကြုံတွေ့ခဲ့ရပါသည်။<br>၂။ မကြုံတွေ့ခဲ့ရပါ။<br>၃။ မသိပါ။<br>၄။ မဖြေဆိုလိုပါ။ |
| ၄။  | တစ်စုံတစ်ယောက်က သင့်အားအရှက်ရစေသော၊ စိတ်အနှောင့်အယှက်ဖြစ်စေသော၊ ရိုင်းစိုင်းသော စာသားများ၊ အကြောင်း အရာများ (သို့) လိင်မှုကိစ္စများနှင့်သက်ဆိုင်သော စကားများပေးပို့ခြင်းကို ပြီးခဲ့တဲ့ (၁၂) လ အတွင်း ကြုံတွေ့ခဲ့ဖူးပါသလား။                                 | ၁။ ကြုံတွေ့ခဲ့ရပါသည်။<br>၂။ မကြုံတွေ့ခဲ့ရပါ။<br>၃။ မသိပါ။<br>၄။ မဖြေဆိုလိုပါ။ |
| ၅။  | တစ်စုံတစ်ယောက်က သင့်ကိုအနှောင့်အယှက်ဖြစ်စေသည့် ဖုန်းခေါ်ဆိုခြင်းများ(သို့) ဖုန်းပြောဆိုခြင်းများကို ပြီးခဲ့တဲ့ (၁၂) လ အတွင်း ကြုံတွေ့ခဲ့ ဖူးပါသလား။                                                                                                        | ၁။ ကြုံတွေ့ခဲ့ရပါသည်။<br>၂။ မကြုံတွေ့ခဲ့ရပါ။<br>၃။ မသိပါ။<br>၄။ မဖြေဆိုလိုပါ။ |
| ၆။  | တစ်စုံတစ်ယောက်က သင့်သဘောဆန္ဒမပါဘဲ သင့်ထံသို့ ဆိုးရွားသည့် ဓာတ်ပုံများ(သို့)ဗီဒီယိုများ(သို့)ညစ်ညမ်းပုံများ ပေးပို့ခြင်းကို ပြီးခဲ့တဲ့ (၁၂) လ အတွင်း ကြုံတွေ့ခဲ့ဖူးပါသလား။                                                                                  | ၁။ ကြုံတွေ့ခဲ့ရပါသည်။<br>၂။ မကြုံတွေ့ခဲ့ရပါ။<br>၃။ မသိပါ။<br>၄။ မဖြေဆိုလိုပါ။ |

|    |                                                                                                                                                                                                               |                                                                               |
|----|---------------------------------------------------------------------------------------------------------------------------------------------------------------------------------------------------------------|-------------------------------------------------------------------------------|
| ၇။ | တစ်စုံတစ်ယောက်က သင့်ခွင့်ပြုချက်မပါဘဲ ခိုးဝှက်၍ သင့်ခါတ်ပုံ၊ ဗီဒီယိုများရိုက်ကူးခြင်း (သို့) ရိုက်ကူး၍ အရှက်ခွဲခြင်း (သို့) ခြိမ်းခြောက်ခြင်း၊ ငွေညစ်ခြင်းကို ပြီးခဲ့တဲ့ (၁၂) လ အတွင်း ကြုံတွေ့ခဲ့ရဖူးပါသလား။ | ၁။ ကြုံတွေ့ခဲ့ရပါသည်။<br>၂။ မကြုံတွေ့ခဲ့ရပါ။<br>၃။ မသိပါ။<br>၄။ မဖြေဆိုလိုပါ။ |
| ၈။ | အထက်ပါနည်းပညာအသုံးပြု၍ ထိခိုက်နစ်နာစေမှု တစ်မျိုးမျိုးကို ပထမဆုံးစတင်ကြုံတွေ့ရစဉ်က သင့်အသက် (ပြည့်ပြီးအသက်) ကိုဖော်ပြပါ။                                                                                      | -----နှစ်                                                                     |
| ၉။ | သင်တစ်ယောက်ယောက်ကို အထက်ပါထိခိုက်နစ်နာ ခံစားရမှု (များ)နှင့် ပတ်သက်ပြီး ပြောပြခဲ့ဖူးပါသလား။                                                                                                                   | ၁။ ပြောပြခဲ့ဖူးပါသည်။<br>၂။ မပြောပြခဲ့ဖူးပါ။<br>၃။ မသိပါ။<br>၄။ မဖြေဆိုလိုပါ။ |

**အပိုင်း (၃) မေးခွန်း**

(က) နည်းပညာ (လက်ကိုင်ဖုန်း၊ ဖုန်ဘုတ်၊ လူမှုကွန်ယက်၊ အင်တာနက်၊ လျှို့ဝှက်ကင်မရာ များအသုံးပြု ထိခိုက်နစ်နာ မှုကြောင့် အကျိုးသက်ရောက်မှု (သင်ဖြေဆိုလိုသည့် အဖြေ၏ နံပါတ်ကို ဝိုင်းပါ။)

| စဉ် | မေးခွန်း                                                                                                                                                              | အဖြေ                                                          |
|-----|-----------------------------------------------------------------------------------------------------------------------------------------------------------------------|---------------------------------------------------------------|
| ၁။  | အထက်ပါ ထိခိုက်နစ်နာစေမှု(များ)ကြောင့် သင်ဆေးလိပ်စသောကတ်တတ်လာသည် (သို့) ပိုသောက်လာသည်။                                                                                 | ၁။ ဟုတ်ပါသည်။<br>၂။ မဟုတ်ပါ။<br>၃။ မသိပါ။<br>၄။ မဖြေဆိုလိုပါ။ |
| ၂။  | အထက်ပါ ထိခိုက်နစ်နာစေမှု(များ)ကြောင့် သင် ကွမ်း စားတတ်လာသည် (သို့) ပိုစားလာသည်။                                                                                       | ၁။ ဟုတ်ပါသည်။<br>၂။ မဟုတ်ပါ။<br>၃။ မသိပါ။<br>၄။ မဖြေဆိုလိုပါ။ |
| ၃။  | အထက်ပါ ထိခိုက်နစ်နာစေမှု(များ)ကြောင့် သင်အရက်စသောကတ်တတ်လာသည် (သို့) ပိုသောက်လာသည်။                                                                                    | ၁။ ဟုတ်ပါသည်။<br>၂။ မဟုတ်ပါ။<br>၃။ မသိပါ။<br>၄။ မဖြေဆိုလိုပါ။ |
| ၄။  | အထက်ပါ ထိခိုက်နစ်နာစေမှု(များ)ကြောင့် သင်စာသင်ချိန်များတွင် အာရုံစူးစိုက်ထားရန် (သို့) သင်ခန်းစာများကိုလွယ်လွယ်ကူကူနားလည် သဘောပေါက်နိုင်မှု ယခင်ကထက်ပိုမိုခက်ခဲလာသည်။ | ၁။ ဟုတ်ပါသည်။<br>၂။ မဟုတ်ပါ။<br>၃။ မသိပါ။                     |

|    |                                                                                                                           |                                                                                                                              |
|----|---------------------------------------------------------------------------------------------------------------------------|------------------------------------------------------------------------------------------------------------------------------|
|    |                                                                                                                           | ၄။ မဖြေဆိုပါ။                                                                                                                |
| ၅။ | အထက်ပါ ထိခိုက်နစ်နာစေမှု(များ)ကြောင့် မိမိကိုယ်ကို သေကြောင်းကြံရန် ပြီးခဲ့တဲ့ (၁၂) လ အတွင်း အလေးအနက် စဉ်းစားခဲ့ဖူးပါသလား။ | ၁။ စဉ်းစားခဲ့ဖူးပါသည်။<br>၂။ မစဉ်းစားခဲ့ဖူးပါ။<br>၃။ မသိပါ။<br>၄။ မဖြေဆိုလိုပါ။<br>(မစဉ်းစားခဲ့ဖူးပါကမေးခွန်း(၉)ကိုဆက်ဖြေပါ) |

(ခ) အခြားသူများ၏ ထိခိုက်နစ်နာမှုများအား မျက်မြင်ကြုံတွေ့မှု (သင်ဖြေဆိုလိုသည့် အဖြေ၏ နံပါတ်ကို ဝိုင်းပါ။)

| စဉ် | မေးခွန်း                                                                                                                                    | အဖြေ                                                                                                                                                                                              |
|-----|---------------------------------------------------------------------------------------------------------------------------------------------|---------------------------------------------------------------------------------------------------------------------------------------------------------------------------------------------------|
| ၁။  | အထက်တွင်မေးမြန်းခဲ့သော ထိခိုက်နစ်နာစေမှုတစ်မျိုးမျိုး သင့်မိဘများအကြား ဖြစ်ပွားနေသည် ကို သင်မျက်မြင် ကြုံဖူး ပါသလား။                        | ၁။ ကြုံဖူးပါသည်။<br>၂။ မကြုံဖူးပါ။<br>၃။ မသိပါ။<br>၄။ မဖြေဆိုလိုပါ။                                                                                                                               |
| ၂။  | အထက်တွင် မေးမြန်းခဲ့သော ထိခိုက်နစ်နာစေမှုတစ်မျိုးမျိုး သင့်သူငယ်ချင်းများအတွင်း သင်မျက်မြင်ကြုံဖူးပါသလား။ ဖြစ်ပွားနေသည်ကို                  | ၁။ ကြုံဖူးပါသည်။<br>၂။ မကြုံဖူးပါ။<br>၃။ မသိပါ။<br>၄။ မဖြေဆိုလိုပါ။                                                                                                                               |
| ၃။  | အထက်တွင်မေးမြန်းခဲ့သော ထိခိုက်နစ်နာစေမှုတစ်မျိုးမျိုး သင့် အိမ်နီးနားချင်းများတွင် ဖြစ်ပွား နေသည်ကို သင်မျက်မြင် ကြုံဖူးပါသလား။             | ၁။ ကြုံဖူးပါသည်။<br>၂။ မကြုံဖူးပါ။<br>၃။ မသိပါ။<br>၄။ မဖြေဆိုလိုပါ။                                                                                                                               |
| ၄။  | သင့်ပတ်ဝန်းကျင်၌ သင်မျက်မြင်ကြုံတွေ့ခဲ့ရသော ထိခိုက်နစ်နာစေမှု အမျိုးအစားများမှာ (အဖြေတစ်ခုထက်ပို၍ ဖြေနိုင်ပါသည်။)                           | ၁။ စိတ်ပိုင်းဆိုင်ရာ ထိခိုက်နစ်နာစေမှု<br>၂။ ရုပ်ပိုင်းဆိုင်ရာ ထိခိုက်နစ်နာစေမှု<br>၃။နည်းပညာအသုံးပြုထိခိုက် နစ်နာစေမှု<br>၄။ ကာယိန္ဒြေဆိုင်ရာ ထိခိုက်နစ်နာစေမှု<br>၅။ မသိပါ။<br>၆။ မဖြေဆိုလိုပါ။ |
| ၅။  | အထက်တွင်မေးမြန်းခဲ့သော ထိခိုက်နစ်နာစေမှုတစ်မျိုးမျိုး ဖြစ်ပွား နေသည့် သတင်းကို သင်အသုံးပြုနေသော လူမှုကွန်ယက် များပေါ်တွင် သင်ကြားဖူးပါသလား။ | ၁။ ကြားဖူးပါသည်။<br>၂။ မကြားဖူးပါ။<br>၃။ မသိပါ။<br>၄။ မဖြေဆိုလိုပါ။                                                                                                                               |
