# Supplementary material for: Assessing risk factors and impact of cyberbullying victimization among university students in Myanmar: A cross-sectional study
Source: PubMed Central journal article supplement (PMC6975531; doi:10.1371/journal.pone.0227051), 2020-01-22
Supplement: pone.0227051.s002.pdf [file pone.0227051.s002.pdf]

**Questionnaire regarding cyberbullying victimization:**

**(Please circle the number of your answer and/or write down in the blank.)**

Code No.

**I. Socio-demographic characteristics**

|    |                                                                           |                                                                                                                            |
|----|---------------------------------------------------------------------------|----------------------------------------------------------------------------------------------------------------------------|
| A1 | Age (completed years)                                                     | _____Years                                                                                                                 |
| A2 | Sex                                                                       | 1. Male<br>2. Female                                                                                                       |
| A3 | Current Marital Status                                                    | 1. Single<br>2. Married<br>3. Divorced/Separated<br>4. Widow                                                               |
| A4 | How long have you been studied in this university?                        | _____Years                                                                                                                 |
| A5 | Do you live in dormitory?                                                 | 1. Yes<br>2. No                                                                                                            |
| A6 | From which State/ Region do you come from?<br>(Permanent address)         | _____(State/Region)                                                                                                        |
| A7 | Name social media you use most commonly?                                  | 1. Facebook<br>2. Instagram<br>3. You tube<br>4. Viber<br>5. We Chat<br>6. Bee Talk<br>7. Other _____<br>(Please specify.) |
| A8 | How many average minutes/hours per day do you spend on that social media? | _____(minutes/hours)                                                                                                       |

## II. Experiences regarding cyberbullying

|    | Did anyone ever                                                                                                                                       | Answers                                                                           |
|----|-------------------------------------------------------------------------------------------------------------------------------------------------------|-----------------------------------------------------------------------------------|
| B1 | hack or stalk or use your facebook/ social media account(s), or smart phone(s) without your consent and pretends to be you during the last 12 months? | 1. Yes<br>2. No<br>3. Don't know<br>4. No response<br>(If not 'Yes', skip to B2)  |
| B2 | use your picture online without your permission during the last 12 months?                                                                            | 1. Yes<br>2. No<br>3. Don't know<br>4. No response<br>(If not 'Yes', skip to B3)  |
| B3 | tell lies or spread false rumours about you behind your back during the last 12 months?                                                               | 1. Yes<br>2. No<br>3. Don't know<br>4. No response<br>(If not 'Yes', skip to B4)  |
| B4 | send you humiliating/annoying/ mean texts or posts or sex chat during the last 12 months?                                                             | 1. Yes<br>2. No<br>3. Don't know<br>4. No response<br>( If not 'Yes', skip to B5) |
| B5 | make upsetting phone calls or malicious prank calls to you during the last 12 months?                                                                 | 1. Yes<br>2. No<br>3. Don't know<br>4. No response<br>( If not 'Yes', skip to B6) |
| B6 | send unpleasant photos, sex pictures or videos to you against your will during the last 12 months?                                                    | 1. Yes<br>2. No<br>3. Don't know<br>4. No response<br>( If not 'Yes', skip to B7) |

|    |                                                                                                               |                                                                                   |
|----|---------------------------------------------------------------------------------------------------------------|-----------------------------------------------------------------------------------|
| B7 | take your photo(s), video(s) without your consent or humiliate you or threaten you during the last 12 months? | 1. Yes<br>2. No<br>3. Don't know<br>4. No response<br>( If not 'Yes', skip to B8) |
| B8 | How old were you when you first experience this/these? (completed years of age)                               | _____ Years                                                                       |
| B9 | Have you ever told anyone about this/these?                                                                   | 1. Yes<br>2. No<br>3. Don't know<br>4. No response                                |

### III. Adverse events following cyberbullying victimization

|    | Because of this/these cyberbullying events you suffered,                                           | Answers                                            |
|----|----------------------------------------------------------------------------------------------------|----------------------------------------------------|
| C1 | You started/increased smoking cigarette.                                                           | 1. Yes<br>2. No<br>3. Don't know<br>4. No response |
| C2 | You started/increased betel chewing.                                                               | 1. Yes<br>2. No<br>3. Don't know<br>4. No response |
| C3 | You started/increased drinking.                                                                    | 1. Yes<br>2. No<br>3. Don't know<br>4. No response |
| C4 | You become more difficult to concentrate on the lectures and to understand them easily than usual. | 1. Yes<br>2. No<br>3. Don't know<br>4. No response |
| C5 | Did you seriously consider attempting suicide during the last 12 months?                           | 1. Yes<br>2. No                                    |

|  |  |                                 |
|--|--|---------------------------------|
|  |  | 3. Don't know<br>4. No response |
|--|--|---------------------------------|

**IV. Witnessing Psychological, Physical or Sexual Violence, or Cyberbullying in the neighbourhood**

|     |                                                                                                            |                                                                                                                                 |
|-----|------------------------------------------------------------------------------------------------------------|---------------------------------------------------------------------------------------------------------------------------------|
| D-1 | Have you ever witnessed any type of the violence mentioned above between your parents?                     | 1. Yes<br>2. No<br>3. Don't know<br>4. No response                                                                              |
| D-2 | Have you ever witnessed any type of the violence mentioned above among your friends?                       | 1. Yes<br>2. No<br>3. Don't know<br>4. No response                                                                              |
| D-3 | Have you ever witnessed any type of the violence mentioned above among your neighbours?                    | 1. Yes<br>2. No<br>3. Don't know<br>4. No response                                                                              |
| D-4 | Type of violence(s) you witnessed in your neighbourhood are                                                | 1. Psychological violence<br>2. Physical violence<br>3. Cyber violence<br>4. Sexual violence<br>5. Don't know<br>6. No response |
| D-5 | Have you ever heard news about any type of the violence/bullying mentioned above on social media you used? | 1. Yes<br>2. No<br>3. Don't know<br>4. No response                                                                              |
